# Supplementary material for: APOBEC3G Inhibits Elongation of HIV-1 Reverse Transcripts
Source: PubMed Central journal article supplement (PMC2584787; doi:10.1371/journal.ppat.1000231), 2008-12-05
Supplement: ppat.1000231.s001.pdf [file ppat.1000231.s001.pdf]

|                                                     |                    |                                      |
|-----------------------------------------------------|--------------------|--------------------------------------|
| <b>Strong stop</b><br>(137 bases) <sup>a</sup>      |                    |                                      |
| Forward<br>Primer                                   | oHC64              | 5' TAACTAGGGAACCCACTGC               |
| Reverse<br>Primer                                   | oHC65              | 5' GCTAGAGATTTTCCCACTG               |
| Probe                                               | oHC66              | 5' FAM-ACACAACAGACGGGCACACACTA-TAMRA |
| <b>tRNA<sup>lys3</sup></b><br>(1 base) <sup>a</sup> |                    |                                      |
| Forward<br>Primer                                   | tRNA-15for         | 5' GTCGGTAGAGCATCAGACTTTTAATCT       |
| Reverse<br>Primer                                   | Long PBS-G-(C)7rev | 5' CCCCCCGTGGCGCCCGAACAGGGACTTGAAC   |
| Probe                                               | Probe-tRNA43for    | 5' FAM-AGGGTCCAGGGTTC-MGB            |
| <b>Set 2</b><br>(16 bases) <sup>a</sup>             |                    |                                      |
| Forward<br>Primer                                   | tRNA-15for         | 5' GTCGGTAGAGCATCAGACTTTTAATCT       |
| Reverse<br>Primer                                   | PBSU5-rev          | 5' GGAAAATCTCTAGCAGTGGCG             |
| Probe                                               | Probe-tRNA43for    | 5' FAM-AGGGTCCAGGGTTC-MGB            |
| <b>Set 3</b><br>(36 bases) <sup>a</sup>             |                    |                                      |
| Forward<br>Primer                                   | tRNA-41for         | 5' TGAGGGTCCAGGGTTCAAGT              |
| Reverse<br>Primer                                   | U5-rev-3           | 5' CAGACCCCTTTTAGTCAGTGTGGAA         |
| Probe                                               | Probe-PBSU5f-3     | 5' FAM-CCTGTTCGGGCGCCACTGCT-BHQ1     |

**Table S1.** Names and sequences of qPCR primers and probes used.

<sup>a</sup> Measured number of bases of cDNA from the 3' end of the tRNA<sup>lys3</sup> primer.
